# Supplementary material for: Prussian blue nanoparticle-based antigenicity and adjuvanticity trigger robust antitumor immune responses against neuroblastoma
Source: Royal Society of Chemistry journal article supplement (doi:10.1039/c8bm01553h), 2019-01-01
Supplement: c8bm01553h1.pdf [file c8bm01553h1.pdf]

## SUPPLEMENTARY INFORMATION

### **Prussian blue nanoparticles-based antigenicity and adjuvanticity trigger robust antitumor immune responses against neuroblastoma**

Juliana Cano-Mejia,<sup>a,b</sup> Michelle L. Bookstaver,<sup>b</sup> Elizabeth E. Sweeney,<sup>a</sup> Christopher M. Jewell<sup>b,c,d,e,f</sup> and Rohan Fernandes<sup>\*a,g</sup>

<sup>a</sup> The George Washington Cancer Center, The George Washington University, Washington, DC 20052, USA.

<sup>b</sup> Fischell Department of Bioengineering, University of Maryland, College Park, MD 20742, USA.

<sup>c</sup> Robert E. Fischell Institute for Biomedical Devices, University of Maryland, College Park, MD 20742, USA.

<sup>d</sup> United States Department of Veterans Affairs, Maryland VA Health Care System Baltimore, MD 21201, USA.

<sup>e</sup> Department of Microbiology and Immunology, University of Maryland Medical School, Baltimore, MD 21205, USA.

<sup>f</sup> Marlene and Stewart Greenebaum Cancer Center, Baltimore, MD 21201, USA.

<sup>g</sup> Department of Medicine, The George Washington University, Washington, DC 20052, USA.

\* E-mail: rfernandes@gwu.edu, Tel: +1-202-994-0899.

This supplementary information document contains Supplementary Figures S1-S4:

(S1) Properties of PEI-PBNPs, (S2) Photothermal heating curves of CpG-PBNPs used in the release assays, (S3) Immunostimulatory properties of CpG-PBNPs, and (S4) Tumor growth curves for individual mice in the various treatment groups.

## Supplementary Figures

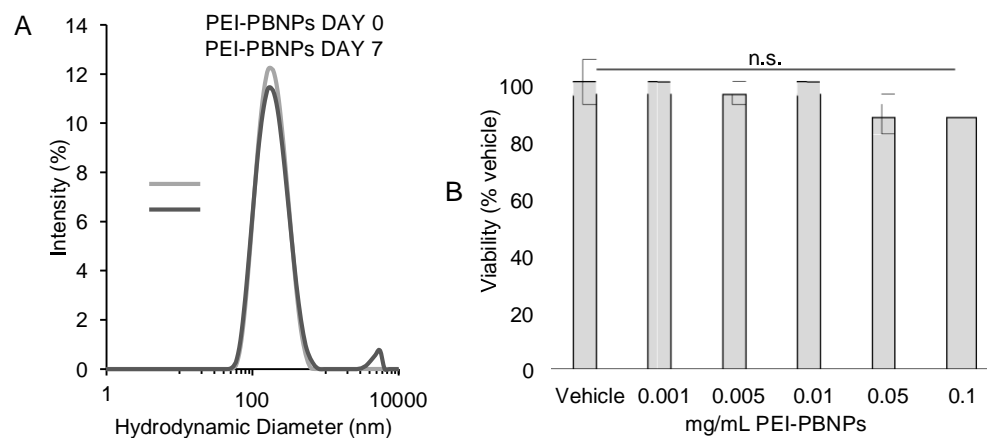

**Figure S1. Properties of PEI-PBNPs.** (A) Stability of PEI-PBNPs over the course of a week measured by DLS. (B) Cytotoxicity of varying concentrations (0.001 – 0.1 mg/mL) of PEI-PBNPs on Neuro2a cells measured by a cell viability assay (n.s., no statistical significant difference in viability,  $p > 0.05$ ).

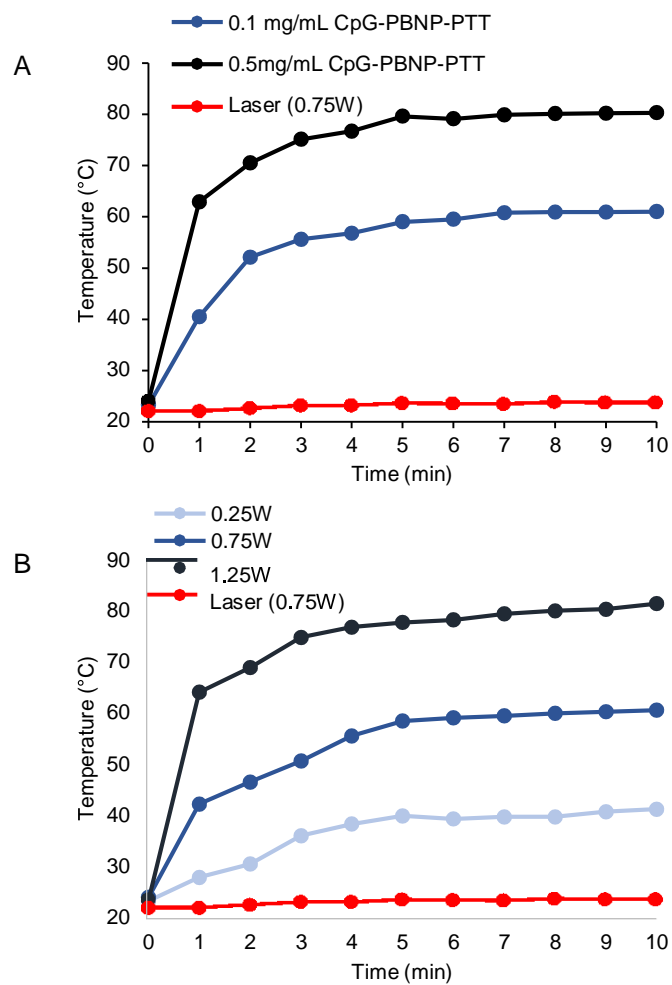

**Figure S2. Photothermal heating curves of CpG-PBNPs.** (A) Photothermal heating curves (temperature-time profiles) of varying concentrations (0.025 – 0.5 mg/mL) of CpG-PBNPs irradiated by an 808 nm NIR laser for 10 minutes at a power of 0.75 W (1.875 W/cm<sup>2</sup>). (B) Photothermal heating of 1 mg/mL CpG-PBNPs using varying NIR laser powers (0.75 - 1.25 W) for 10 minutes.

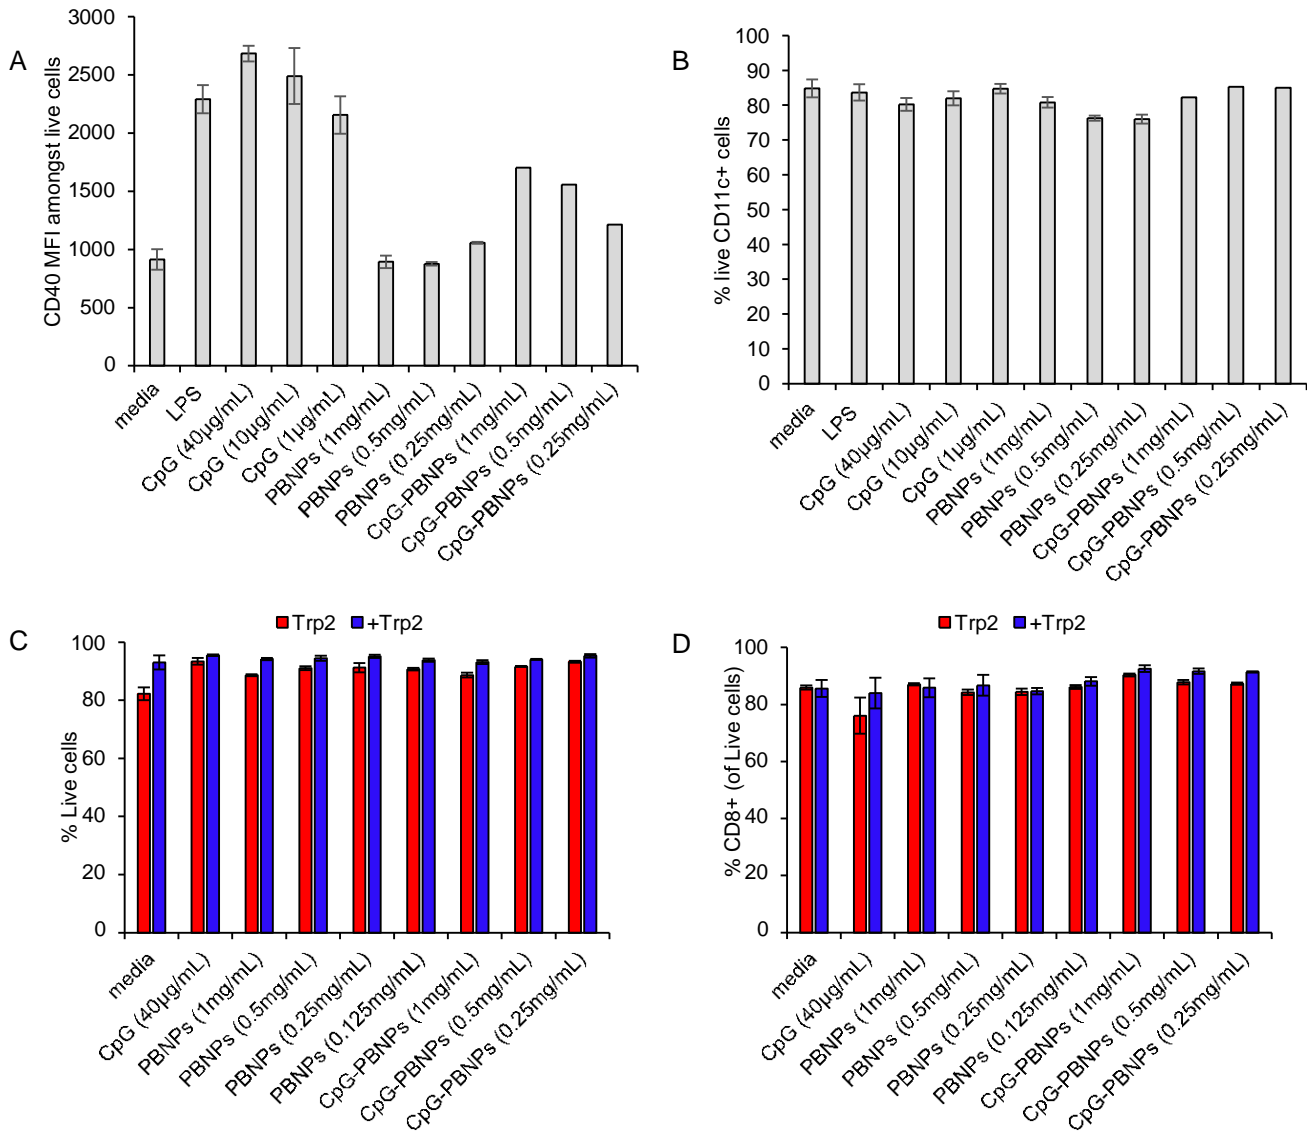

**Figure S3. Immunostimulatory properties of CpG-PBNPs.** (A) CD40 MFI amongst CD11c+ positive cells. (B) % live CD11c+ positive cells treated with varying concentrations (1 – 0.25 mg/mL) CpG-PBNPs and controls (Free CpG, PBNPs). (C) % live cells treated with varying concentrations (1x-4x; 1 – 0.25mg/mL) CpG-PBNPs and controls (Free CpG, PBNPs) with and without the antigen Trp2. (D) % CD8+ positive cells treated with varying concentrations (1 – 0.25 mg/mL) CpG-PBNPs and controls (media, free CpG, PBNPs).

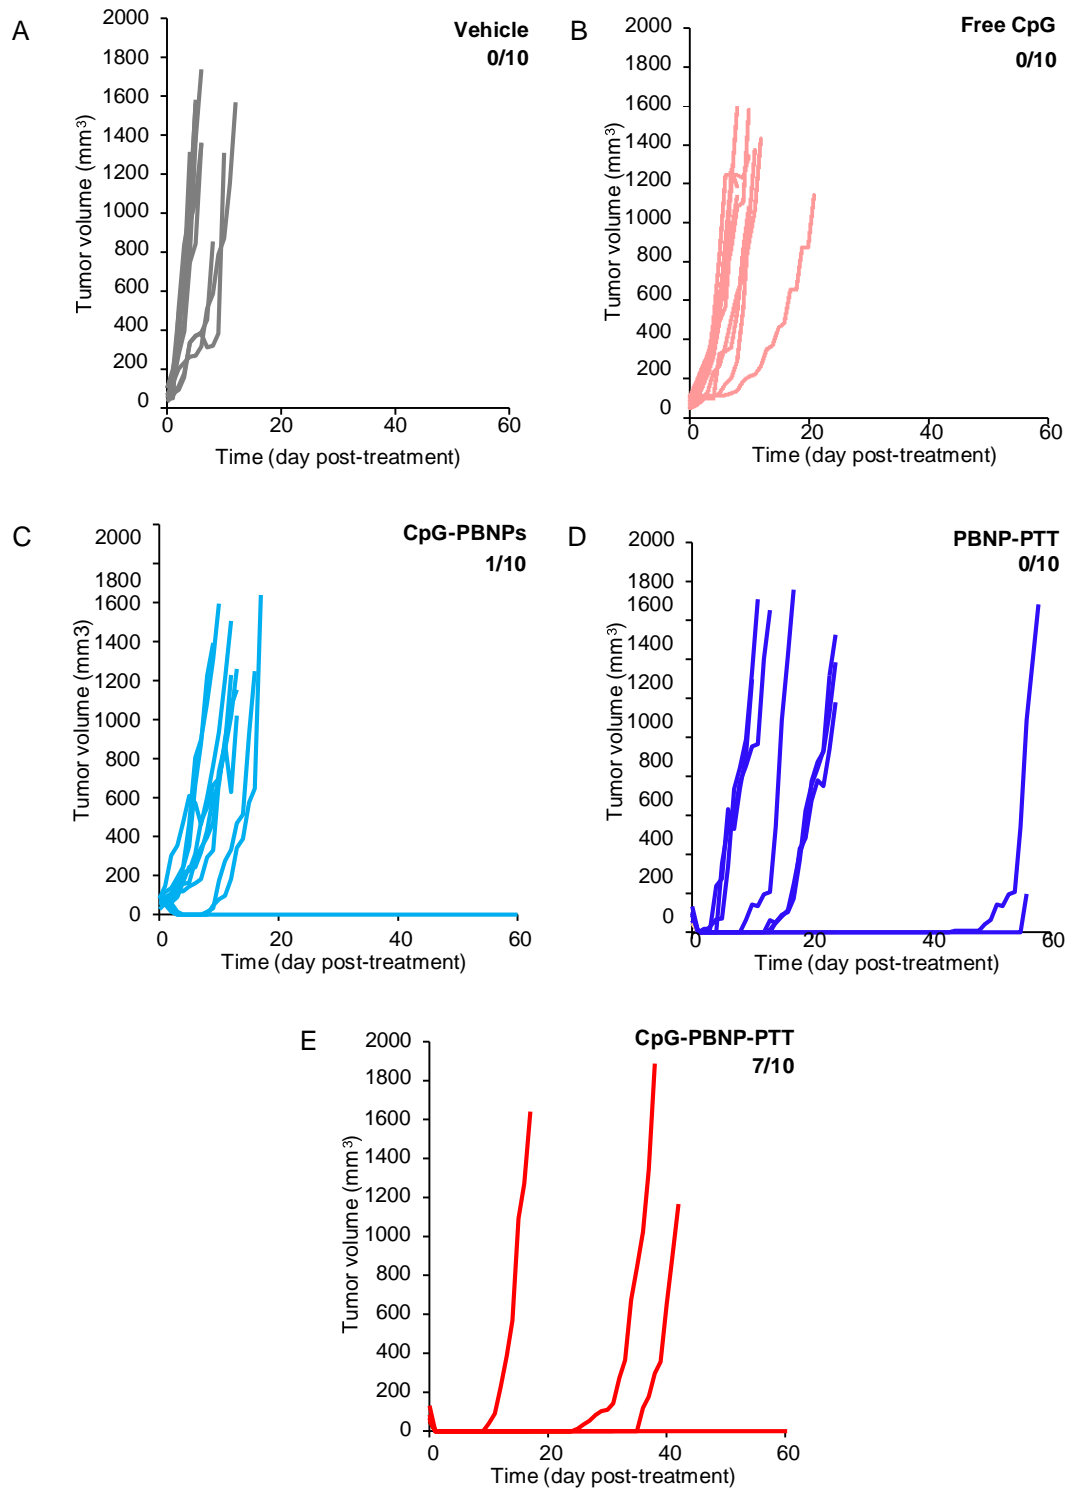

**Figure S4. Tumor growth curves for individual mice in the various treatment groups:** (A) Vehicle, (B) CpG-treated, (C) CpG-PBNP-treated, (D) PBNP-PTT-treated, (E) CpG-PBNP-PTT-treated. Each line represents tumor growth measured in one mouse (numbers in parentheses in each panel A-E indicate number of long-term surviving mice in each group i.e. >60 day survival).
